# Supplementary material
Source: PubMed Central journal article supplement (PMC4907239)
Supplement: JVI.03246-15_zjv999181705so1.pdf [file JVI.03246-15_zjv999181705so1.pdf]

**Table S1. Amino acid sequences of 10E8 variants.**

**Heavy chain**

|                    |            |            |             |            |            |            |            |            |            |     |
|--------------------|------------|------------|-------------|------------|------------|------------|------------|------------|------------|-----|
|                    | 5          | 15         | 25          | 35         | 45         | 52C        | 62         | 72         | 82         | 84  |
| 10E8               | EVQLVESGGG | LVKPGGSLRL | SCSASGDFD   | NAWMTWVRQP | PGKGLEWVGR | ITGPGEGWSV | DYAAPVEGRF | TISRLNSINF | LYLEMNLRM  |     |
| HC6                | .R.A.      | .          | .           | .          | .          | .          | .          | .          | .          | .   |
| HC6-S74W           | .R.A.      | .          | .           | .          | .          | .          | .          | W          | .          | .   |
| HC6-S74Y           | .R.A.      | .          | .           | .          | .          | .          | .          | Y          | .          | .   |
| HC6-S74Y-DKTT      | .R.A.      | .          | .           | .          | .          | .          | .          | D.YK.T     | .          | T   |
| H6                 | .R.        | .          | N.          | D.         | .          | S.         | .          | ES.K.      | .          | V.T |
| H6-DTKT            | .R.        | .          | N.          | D.         | .          | S.         | .          | ES.K.      | D.TK.T     | V.T |
| H6-DTKT-DNTY       | .R.        | .          | .           | .          | .          | .          | .          | ES.K.      | D.TK.T     | V.T |
| H6-DTKT-DNTY-LS    | .R.        | .          | .           | .          | .          | .          | .          | ES.K.      | D.TK.T     | V.T |
| H6-DTKT-DNTY-Y100e | .R.        | .          | .           | .          | .          | .          | .          | ES.K.      | D.TK.T     | V.T |
| H8                 | .R.        | R          | .           | N.         | .          | .          | .          | S.K.       | M.         | F.  |
| H8-DYKT            | .R.        | R          | .           | N.         | .          | .          | .          | S.K.       | D.YK.T     | F.  |
|                    | 89         | 99         | 101I        | 107        | 117        | 127        | 137        | 147        | 157        |     |
| 10E8               | EDSGLYFCAR | TGKYDFWSG  | YPPGEEYQD   | WGRGTLVTS  | SASTKGPSVF | PLAPSSKSTS | GGTAALGCLV | KDYFPEPVTV | SWNSGALTS  |     |
| HC6                | .          | .          | .           | I.         | .          | .          | .          | .          | .          |     |
| HC6-S74W           | .          | .          | .           | I.         | .          | .          | .          | .          | .          |     |
| HC6-S74Y           | .          | .          | .           | I.         | .          | .          | .          | .          | .          |     |
| HC6-S74Y-DKTT      | .          | .          | .           | I.         | .          | .          | .          | .          | .          |     |
| H6                 | .T.Y.      | H.         | .           | Q.         | I.         | .          | .          | .          | .          |     |
| H6-DTKT            | .T.Y.      | H.         | .           | Q.         | I.         | .          | .          | .          | .          |     |
| H6-DTKT-DNTY       | .T.Y.      | .          | .           | Q.         | I.         | .          | .          | .          | .          |     |
| H6-DTKT-DNTY-LS    | .T.Y.      | .          | .           | Q.         | I.         | .          | .          | .          | .          |     |
| H6-DTKT-DNTY-Y100e | .T.Y.      | .          | C.          | Q.         | I.         | .          | .          | .          | .          |     |
| H8                 | .T.        | H.A.       | G.          | LE.        | Q.         | I.         | .          | .          | .          |     |
| H8-DYKT            | .T.        | H.A.       | G.          | LE.        | Q.         | I.         | .          | .          | .          |     |
|                    | 167        | 177        | 187         | 197        | 207        | 217        | 227        | 237        | 247        |     |
| 10E8               | VHTFFAVLQS | SGLYSLSSVV | TVPSSSLGTQ  | TYICNVNHPK | SNTKVDKKVE | PKSCDKTHTC | PPCPAPELLG | GPSVFLFPPK | PKDTLMISRT |     |
| HC6                | .          | .          | .           | .          | .          | .          | .          | .          | .          |     |
| HC6-S74W           | .          | .          | .           | .          | .          | .          | .          | .          | .          |     |
| HC6-S74Y           | .          | .          | .           | .          | .          | .          | .          | .          | .          |     |
| HC6-S74Y-DKTT      | .          | .          | .           | .          | .          | .          | .          | .          | .          |     |
| H6                 | .          | .          | .           | .          | .          | .          | .          | .          | .          |     |
| H6-DTKT            | .          | .          | .           | .          | .          | .          | .          | .          | .          |     |
| H6-DTKT-DNTY       | .          | .          | .           | .          | .          | .          | .          | .          | .          |     |
| H6-DTKT-DNTY-LS    | .          | .          | .           | .          | .          | .          | .          | .          | .          |     |
| H6-DTKT-DNTY-Y100e | .          | .          | .           | .          | .          | .          | .          | .          | .          |     |
| H8                 | .          | .          | .           | .          | .          | .          | .          | .          | .          |     |
| H8-DYKT            | .          | .          | .           | .          | .          | .          | .          | .          | .          |     |
|                    | 257        | 267        | 277         | 287        | 297        | 307        | 317        | 327        | 337        |     |
| 10E8               | PEVTCVVVDV | SHEDPEVKFN | WYVDGVEVHN  | AKTKPREEQY | NSTYRVVSVL | TVLHQDWLNG | KEYKCKVSNK | ALPAPIEKTI | SKAKGQPREP |     |
| HC6                | .          | .          | .           | .          | .          | .          | .          | .          | .          |     |
| HC6-S74W           | .          | .          | .           | .          | .          | .          | .          | .          | .          |     |
| HC6-S74Y           | .          | .          | .           | .          | .          | .          | .          | .          | .          |     |
| HC6-S74Y-DKTT      | .          | .          | .           | .          | .          | .          | .          | .          | .          |     |
| H6                 | .          | .          | .           | .          | .          | .          | .          | .          | .          |     |
| H6-DTKT            | .          | .          | .           | .          | .          | .          | .          | .          | .          |     |
| H6-DTKT-DNTY       | .          | .          | .           | .          | .          | .          | .          | .          | .          |     |
| H6-DTKT-DNTY-LS    | .          | .          | .           | .          | .          | .          | .          | .          | .          |     |
| H6-DTKT-DNTY-Y100e | .          | .          | .           | .          | .          | .          | .          | .          | .          |     |
| H8                 | .          | .          | .           | .          | .          | .          | .          | .          | .          |     |
| H8-DYKT            | .          | .          | .           | .          | .          | .          | .          | .          | .          |     |
|                    | 347        | 357        | 367         | 377        | 387        | 397        | 407        | 417        | 427        |     |
| 10E8               | QVYTLPPSRD | ELTKNQVSLT | CLVKGFPYPSD | IAVEWESNGQ | PENNYKTPPP | VLDSDGSFFL | YSKLTVDKSR | WQQGNVFCSS | VMHEALHNHY |     |
| HC6                | .          | .          | .           | .          | .          | .          | .          | .          | .          |     |
| HC6-S74W           | .          | .          | .           | .          | .          | .          | .          | .          | .          |     |
| HC6-S74Y           | .          | .          | .           | .          | .          | .          | .          | .          | .          |     |
| HC6-S74Y-DKTT      | .          | .          | .           | .          | .          | .          | .          | .          | .          |     |
| H6                 | .          | .          | .           | .          | .          | .          | .          | .          | .          |     |
| H6-DTKT            | .          | .          | .           | .          | .          | .          | .          | .          | .          |     |
| H6-DTKT-DNTY       | .          | .          | .           | .          | .          | .          | .          | .          | .          |     |
| H6-DTKT-DNTY-LS    | .          | .          | .           | .          | .          | .          | .          | .          | L.S.       |     |
| H6-DTKT-DNTY-Y100e | .          | .          | .           | .          | .          | .          | .          | .          | .          |     |
| H8                 | .          | .          | .           | .          | .          | .          | .          | .          | .          |     |
| H8-DYKT            | .          | .          | .           | .          | .          | .          | .          | .          | .          |     |
|                    | 437        |            |             |            |            |            |            |            |            |     |
| 10E8               | TQKSLSLSPG | K          |             |            |            |            |            |            |            |     |
| HC6                | .          | .          | .           | .          | .          | .          | .          | .          | .          |     |
| HC6-S74W           | .          | .          | .           | .          | .          | .          | .          | .          | .          |     |
| HC6-S74Y           | .          | .          | .           | .          | .          | .          | .          | .          | .          |     |
| HC6-S74Y-DKTT      | .          | .          | .           | .          | .          | .          | .          | .          | .          |     |
| H6                 | .          | .          | .           | .          | .          | .          | .          | .          | .          |     |
| H6-DTKT            | .          | .          | .           | .          | .          | .          | .          | .          | .          |     |
| H6-DTKT-DNTY       | .          | .          | .           | .          | .          | .          | .          | .          | .          |     |
| H6-DTKT-DNTY-LS    | .          | .          | .           | .          | .          | .          | .          | .          | .          |     |
| H6-DTKT-DNTY-Y100e | .          | .          | .           | .          | .          | .          | .          | .          | .          |     |
| H8                 | .          | .          | .           | .          | .          | .          | .          | .          | .          |     |
| H8-DYKT            | .          | .          | .           | .          | .          | .          | .          | .          | .          |     |

**Continues...**

**Table S1 (continued). Amino acid sequences of 10E8 variants\*.**

**Light chain**

|                |             |             |             |             |             |             |             |             |             |
|----------------|-------------|-------------|-------------|-------------|-------------|-------------|-------------|-------------|-------------|
|                | ..... ..... | ..... ..... | ..... ..... | ..... ..... | ..... ..... | ..... ..... | ..... ..... | ..... ..... | ..... ..... |
|                | 5           | 16          | 26          | 36          | 46          | 56          | 66          | 76          | 86          |
| 10E8           | SYELTQETGV  | SVALGRTVII  | TCRGDSLRS   | YASWYQKKPG  | QAPILLFYGK  | NNRPSGVPDR  | FSGSASGNRA  | SLTISGAQAE  | DDAEYCSSR   |
| L3             | .....D...   | .....       | .....       | .....       | ..V.....    | .....I...   | .....T..... | ..E.D.....  | .....       |
| L3-ASPAKQ      | AS...DPA.   | ...KQ...    | .....       | .....       | ..V.....    | .....I...   | .....T..... | ..E.D.....  | .....       |
| L3-ASPAKQ-S30C | AS...DPA.   | ...KQ...    | .....C.     | .....       | ..V.....    | .....I...   | .....T..... | ..E.D.....  | .....       |
| L10            | AS...DPA.   | ...KQ...    | .....       | .....       | ..V.V.....  | .....I...   | ...S..T.    | ...A.....   | ...D.....   |
|                | ..... ..... | ..... ..... | ..... ..... | ..... ..... | ..... ..... | ..... ..... | ..... ..... | ..... ..... | ..... ..... |
|                | 95A         | 103         | 113         | 123         | 133         | 143         | 153         | 163         | 173         |
| 10E8           | DKSGSRLSVF  | GGGTKLTVLS  | QPKAAPSVTL  | FPPSSEELQA  | NKATLVCLIS  | DFYPGAVTVA  | WKADSSPVKA  | GVETTTPSKQ  | SNNKYAASSY  |
| L3             | .....       | .....       | .....       | .....       | .....       | .....       | .....       | .....       | .....       |
| L3-ASPAKQ      | .....       | .....       | .....       | .....       | .....       | .....       | .....       | .....       | .....       |
| L3-ASPAKQ-S30C | .....       | .....       | .....       | .....       | .....       | .....       | .....       | .....       | .....       |
| L10            | .....       | .....       | .....       | .....       | .....       | .....       | .....       | .....       | .....       |
|                | ..... ..... | ..... ..... | ..... ..... | .....       |             |             |             |             |             |
|                | 183         | 193         | 203         | 213         |             |             |             |             |             |
| 10E8           | LSLTPEQWKS  | HRSYSCQVTH  | EGSTVEKTVA  | PTECS       |             |             |             |             |             |
| L3             | .....       | .....       | .....       | .....       |             |             |             |             |             |
| L3-ASPAKQ      | .....       | .....       | .....       | .....       |             |             |             |             |             |
| L3-ASPAKQ-S30C | .....       | .....       | .....       | .....       |             |             |             |             |             |
| L10            | .....       | .....       | .....       | .....       |             |             |             |             |             |

\* 10E8 variants comprised the following heavy and light chain combinations:  
 10E8v1: HC6-S74Y-DKTT/L3  
 10E8v4: H6-DTKT-DNTY/L3-ASPAKQ  
 10E8v4-LS: H6-DTKT-DNTY-LS/L3-ASPAKQ  
 10E8v4-DS: H6-DTKT-DNTY-Y100eC/L3-ASPAKQ-S30C  
 10E8v5: HC6-S74Y-DKTT/L3-ASPAKQ
